# Supplementary material for: Bandgap engineering in Mn3TeO6: giant irreversible bandgap reduction triggered by pressure
Source: Royal Society of Chemistry journal article supplement (doi:10.1039/c9cc04821a), 2019-01-01
Supplement: c9cc04821a1.pdf [file c9cc04821a1.pdf]

## Supplementary Materials

### **Bandgap Engineering in $\text{Mn}_3\text{TeO}_6$ : Giant Irreversible Bandgap Reduction Triggered by Pressure**

Lei Liu, <sup>\*a</sup> Henrik Skogby, <sup>b</sup> Sergey Ivanov, <sup>cd</sup> Matthias Weil, <sup>e</sup> Roland Mathieu <sup>c</sup> and Peter Lazor <sup>\*a</sup>

<sup>a</sup>Department of Earth Sciences, Uppsala University, Uppsala 75236, Sweden.

<sup>b</sup>Department of Geosciences, Swedish Museum of Natural History, Stockholm, 10405, Sweden.

<sup>c</sup>Department of Engineering Sciences, Uppsala University, Uppsala 75121, Sweden.

<sup>d</sup>Department of Inorganic Materials, Karpov's Institute of Physical Chemistry, Vorontsovo pole, Moscow 105046, Russia.

<sup>e</sup>Institute for Chemical Technologies and Analytics, TU Wien, Getreidemarkt 9/164-SC, A1060 Vienna, Austria.

\*E-mail: lei.liu@geo.uu.se; peter.lazor@geo.uu.se

## 1. Sample information

Polycrystalline MTO material was prepared by solid-state reactions of a mixture of MnO and TeO<sub>3</sub> (molar ratio 3:1). The binary oxides were thoroughly ground, pressed into a pellet and placed in a silica ampoule that was evacuated, sealed, and heated within 3 h to 1103 K and kept at this temperature for 3 days.<sup>1</sup> X-ray powder diffraction of the light-brown product revealed a single phase. Single crystals of MTO were grown by chemical transport reactions. 80 mg of polycrystalline MTO were mixed with 5 mg PtCl<sub>2</sub> as the chlorine source (transport agent) and loaded in an evacuated and sealed silica ampoule that was subsequently heated in a temperature gradient from 1103 to 1023 K for five days. Yellow to amber coloured crystals of the title compound with a plate-like form and an edge-length up to 0.8 mm had formed in the colder part of the ampoule.

The chemical compositions of the prepared crystals and ceramic samples were determined by energy-dispersive spectroscopy (EDS) using a JEOL 840A scanning electron microscope and INCA 4.07 (Oxford Instruments) software. The analyses performed on several samples showed that the concentration ratios of Mn:Te were as expected for Mn<sub>3</sub>TeO<sub>6</sub> within the instrumental resolution (0.05).<sup>2,3</sup> Structure analysis of MTO single crystals was performed at room temperature on a SMART Bruker three-circle diffractometer.

## 2. High-pressure Raman experiment

Raman scattering experiments were conducted in the Department of Earth Sciences, Uppsala University using a self-built micro-Raman system with the backscattering geometry. The DPSS laser (Cobolt Samba, 532.42 nm) was used as the excitation source. The laser beam size was

focused down to  $\sim 2\text{-}4\ \mu\text{m}$  on the sample surface by a 20 X long working distance objective (Nikon). The Rayleigh line was blocked by two holographic notch filters (Semrock). The high-throughput single stage imaging spectrometer (HoloSpec f/1.8i, Kaiser Optical Systems, Inc.) was used to analyse the scattered light. The Raman spectra were collected by the CCD detector (Newton, Andor technology,  $1600 \times 400$  pixels, thermoelectrically cooled to  $-55\ ^\circ\text{C}$ ). The system was calibrated with the fluorescence of a neon lamp and the first-order Raman band of single crystal silicon. The spectral resolution of the system is around  $4\ \text{cm}^{-1}$  and the accuracy estimated from the calibration procedure is around  $2\ \text{cm}^{-1}$ . Raman spectra were collected in the range  $50\text{-}2200\ \text{cm}^{-1}$  at room temperature. The laser power was set to 10 mW, and the spectral acquisition time varied between 120 and 1800 s. The symmetric DAC with anvils having a culet size of  $300\ \mu\text{m}$  was used to generate high pressure. The T301 stainless steel foil with a sample chamber diameter of  $110\ \mu\text{m}$  was used as a gasket. One piece of MTO single crystals loaded with two ruby balls in the sample chamber were used for the compression and decompression Raman measurements in the pressure range 0-40 GPa. The silicone oil was used as a pressure medium and the ruby fluorescence was used as a pressure gauge.<sup>4</sup>

### 3. *In situ* UV-vis absorption experiment

The *in situ* UV-vis absorption spectroscopy experiment was performed at the Swedish Museum of Natural History. The Spectra were collected from 280-1100 nm using a customized visible microscope system with the transmitting mode. The Merrill-Bassett DAC with a pair of  $300\ \mu\text{m}$  culet diamonds were used to generate high pressure. A T301 stainless steel foil with an initial thickness of  $250\ \mu\text{m}$  was pre-indented to around  $30\ \mu\text{m}$ . A hole with a diameter of around  $100\ \mu\text{m}$  was drilled in the center using as sample hole. A piece of MTO single crystal with the typical

size around 50  $\mu\text{m}$  was loaded in the sample hole with a ruby ball, which served as a pressure gauge.<sup>4</sup> Silicone oil was also loaded as a pressure medium.

#### 4. Tauc plot

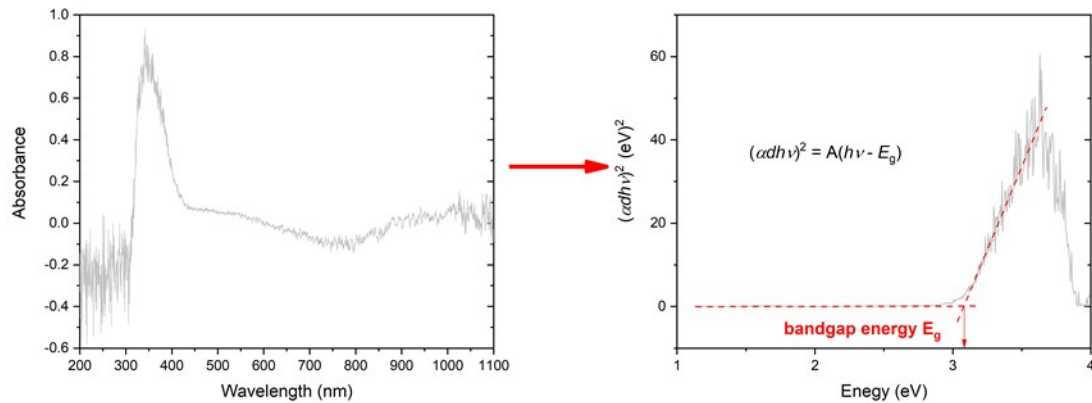

Fig. S1. The absorption spectrum and the converted Tauc plot for measuring the bandgap energy.

#### Reference

1. M. Weil, *Acta Cryst.*, 2006, **E62**, i244.
2. S. A. Ivanov, P. Nordblad, R. Mathieu, R. Tellgren, C. Ritter, N. V. Golubko, E. D. Politova and M. Weil, *Mater. Res. Bull.*, 2011, **46**, 1870.
3. S. A. Ivanov, R. Mathieu, P. Nordblad, C. Ritter, R. Tellgren, N. Golubko, A. Mosunov, E. D. Politova and M. Weil, *Mater. Res. Bull.*, 2014, **50**, 42.
4. A. Dewaele, M. Torrent, P. Loubeyre and M. Mezouar, *Phys. Rev. B*, 2008, **78**, 104102.
